# Supplementary material for: Improvement of Targeted Fungi Secondary Metabolite Production Using a Systematic Experimental Design and Chemometrics Analysis
Source: MDPI journal article supplement (doi:10.3390/mps6050077), 2023-08-29
Supplement: s1 [file s1]

## SUPPLEMENTARY INFORMATION

**TABLE S1.** Example of 1<sup>st</sup>-order effects calculated from global desirabilities (D) of fraction F2 obtained from each growth experiment (performed in triplicate) by *Penicillium* sp. DRF2.

**TABLE S2.** Example of 2<sup>nd</sup>-order effects calculated from global desirabilities (D) of fraction F2 obtained from each growth experiment (performed in triplicate) by *Penicillium* sp. DRF2.

**FIGURE S1.** HPLC-UV analysis of fraction F2 produced by *Penicillium* sp. DRF2 under conditions of experiment #7.

**FIGURE S2.** HPLC-UV analysis of fraction F2 produced by *Penicillium* sp. DRF2 under conditions of experiment #11.

**FIGURE S3.** HPLC-UV analysis of fraction F2 produced by *Penicillium* sp. DRF2 under conditions of experiment #17.

**FIGURE S4.** HPLC-UV analysis of fraction F3 produced by *Penicillium* sp. DRF2 under conditions of experiment #11.

**FIGURE S5.** HPLC-UV analysis of fraction F3 produced by *Penicillium* sp. DRF2 under conditions of experiment #17.

**TABLE S1.** Example of 1<sup>st</sup>-order effects calculated from global desirabilities (D) of fraction F2 obtained from each growth experiment (performed in triplicate) by *Penicillium* sp. DRF2.

| FFED |    |    |    |    |    |      | 1 <sup>st</sup> -order effect |       |       |       |       |
|------|----|----|----|----|----|------|-------------------------------|-------|-------|-------|-------|
| #    | 1  | 2  | 3  | 4  | 5  | D    | 1xD                           | 2xD   | 3xD   | 4xD   | 5xD   |
| 1    | -1 | -1 | -1 | -1 | +1 | 0.26 | -0.26                         | -0.26 | -0.26 | -0.26 | 0.26  |
| 2    | +1 | -1 | -1 | -1 | -1 | 0.28 | 0.28                          | -0.28 | -0.28 | -0.28 | -0.28 |
| 3    | -1 | +1 | -1 | -1 | -1 | 0.39 | -0.39                         | 0.39  | -0.39 | -0.39 | -0.39 |
| 4    | +1 | +1 | -1 | -1 | +1 | 0.55 | 0.55                          | 0.55  | -0.55 | -0.55 | 0.55  |
| 5    | -1 | -1 | +1 | -1 | -1 | 0.06 | -0.06                         | -0.06 | 0.06  | -0.06 | -0.06 |
| 6    | +1 | -1 | +1 | -1 | +1 | 0.21 | 0.21                          | -0.21 | 0.21  | -0.21 | 0.21  |
| 7    | -1 | +1 | +1 | -1 | +1 | 0.66 | -0.66                         | 0.66  | 0.66  | -0.66 | 0.66  |
| 8    | +1 | +1 | +1 | -1 | -1 | 0.39 | 0.39                          | 0.39  | 0.39  | -0.39 | -0.39 |

|                           |    |    |    |    |    |      |              |              |              |              |              |
|---------------------------|----|----|----|----|----|------|--------------|--------------|--------------|--------------|--------------|
| <b>9</b>                  | -1 | -1 | -1 | +1 | -1 | 0.58 | -0.58        | -0.58        | -0.58        | 0.58         | -0.58        |
| <b>10</b>                 | +1 | -1 | -1 | +1 | +1 | 0.37 | 0.37         | -0.37        | -0.37        | 0.37         | 0.37         |
| <b>11</b>                 | -1 | +1 | -1 | +1 | +1 | 0.61 | -0.61        | 0.61         | -0.61        | 0.61         | 0.61         |
| <b>12</b>                 | +1 | +1 | -1 | +1 | -1 | 0.36 | 0.36         | 0.36         | -0.36        | 0.36         | -0.36        |
| <b>13</b>                 | -1 | -1 | +1 | +1 | +1 | 0.13 | -0.13        | -0.13        | 0.13         | 0.13         | 0.13         |
| <b>14</b>                 | +1 | -1 | +1 | +1 | -1 | 0.36 | 0.36         | -0.36        | 0.36         | 0.36         | -0.36        |
| <b>15</b>                 | -1 | +1 | +1 | +1 | -1 | 0.36 | -0.36        | 0.36         | 0.36         | 0.36         | -0.36        |
| <b>16</b>                 | +1 | +1 | +1 | +1 | +1 | 0.64 | 0.64         | 0.64         | 0.64         | 0.64         | 0.64         |
| $\Sigma y^+$              |    |    |    |    |    |      | <b>3.16</b>  | <b>3.96</b>  | <b>2.81</b>  | <b>3.41</b>  | <b>3.43</b>  |
| $\Sigma y^-$              |    |    |    |    |    |      | <b>-3.05</b> | <b>-2.25</b> | <b>-3.40</b> | <b>-2.80</b> | <b>-2.78</b> |
| $\Sigma y^+ + \Sigma y^-$ |    |    |    |    |    |      | <b>0.08</b>  | <b>1.68</b>  | <b>-0.58</b> | <b>0.61</b>  | <b>0.65</b>  |
| $E_i (\Sigma/8)$          |    |    |    |    |    |      | <b>0.01</b>  | <b>0.21</b>  | <b>-0.07</b> | <b>0.08</b>  | <b>0.09</b>  |
| $P_i (\%)$                |    |    |    |    |    |      | <b>0.2</b>   | <b>37.6</b>  | <b>4.5</b>   | <b>4.8</b>   | <b>5.4</b>   |

---

**TABLE S2.** Example of 2<sup>nd</sup>-order effects calculated from global desirabilities (D) of fraction F2 obtained from each growth experiment (performed in triplicate) by *Penicillium* sp. DRF2.

| #  | <i>D</i>                  | 2 <sup>nd</sup> -order effect |              |              |              |              |              |              |              |              |              |
|----|---------------------------|-------------------------------|--------------|--------------|--------------|--------------|--------------|--------------|--------------|--------------|--------------|
|    |                           | 1x2xD                         | 1x3xD        | 1x4xD        | 1x5xD        | 2x3xD        | 2x4xD        | 2x5xD        | 3x4xD        | 3x5xD        | 4xD          |
| 1  | 0.26                      | 0.26                          | 0.26         | 0.26         | -0.26        | 0.26         | 0.26         | -0.26        | 0.26         | -0.26        | -0.26        |
| 2  | 0.28                      | -0.28                         | -0.28        | -0.28        | -0.28        | 0.28         | 0.28         | 0.28         | 0.28         | 0.28         | 0.28         |
| 3  | 0.39                      | -0.39                         | 0.39         | 0.39         | 0.39         | -0.39        | -0.39        | -0.39        | 0.39         | 0.39         | 0.39         |
| 4  | 0.55                      | 0.55                          | -0.55        | -0.55        | 0.55         | -0.55        | -0.55        | 0.55         | 0.55         | -0.55        | -0.55        |
| 5  | 0.06                      | 0.06                          | -0.06        | 0.06         | 0.06         | -0.06        | 0.06         | 0.06         | -0.06        | -0.06        | 0.06         |
| 6  | 0.21                      | -0.21                         | 0.21         | -0.21        | 0.21         | -0.21        | 0.21         | -0.21        | -0.21        | 0.21         | -0.21        |
| 7  | 0.66                      | -0.66                         | -0.66        | 0.66         | -0.66        | 0.66         | -0.66        | 0.66         | -0.66        | 0.66         | -0.66        |
| 8  | 0.39                      | 0.39                          | 0.39         | -0.39        | -0.39        | 0.39         | -0.39        | -0.39        | -0.39        | -0.39        | 0.39         |
| 9  | 0.58                      | 0.58                          | 0.58         | -0.58        | 0.58         | 0.58         | -0.58        | 0.58         | -0.58        | 0.58         | -0.58        |
| 10 | 0.37                      | -0.37                         | -0.37        | 0.37         | 0.37         | 0.37         | -0.37        | -0.37        | -0.37        | -0.37        | 0.37         |
| 11 | 0.61                      | -0.61                         | 0.61         | -0.61        | -0.61        | -0.61        | 0.61         | 0.61         | -0.61        | -0.61        | 0.61         |
| 12 | 0.36                      | 0.36                          | -0.36        | 0.36         | -0.36        | -0.36        | 0.36         | -0.36        | -0.36        | 0.36         | -0.36        |
| 13 | 0.13                      | 0.13                          | -0.13        | -0.13        | -0.13        | -0.13        | -0.13        | -0.13        | 0.13         | 0.13         | 0.13         |
| 14 | 0.36                      | -0.36                         | 0.36         | 0.36         | -0.36        | -0.36        | -0.36        | 0.36         | 0.36         | -0.36        | -0.36        |
| 15 | 0.36                      | -0.36                         | -0.36        | -0.36        | 0.36         | 0.36         | 0.36         | -0.36        | 0.36         | -0.36        | -0.36        |
| 16 | 0.64                      | 0.64                          | 0.64         | 0.64         | 0.64         | 0.64         | 0.64         | 0.64         | 0.64         | 0.64         | 0.64         |
|    | $\Sigma y^+$              | <b>2.97</b>                   | <b>3.44</b>  | <b>3.10</b>  | <b>3.16</b>  | <b>3.54</b>  | <b>2.78</b>  | <b>3.74</b>  | <b>2.97</b>  | <b>3.25</b>  | <b>2.87</b>  |
|    | $\Sigma y^-$              | <b>-3.24</b>                  | <b>-2.77</b> | <b>-3.11</b> | <b>-3.05</b> | <b>-2.67</b> | <b>-3.43</b> | <b>-2.47</b> | <b>-3.24</b> | <b>-2.96</b> | <b>-3.34</b> |
|    | $\Sigma y^+ + \Sigma y^-$ | <b>-0.27</b>                  | <b>0.67</b>  | <b>-0.01</b> | <b>0.11</b>  | <b>0.87</b>  | <b>-0.65</b> | <b>1.27</b>  | <b>-0.27</b> | <b>0.29</b>  | <b>-0.47</b> |
|    | $E_i (\Sigma/8)$          | <b>-0.03</b>                  | <b>0.08</b>  | <b>0.00</b>  | <b>0.01</b>  | <b>0.11</b>  | <b>-0.08</b> | <b>0.16</b>  | <b>-0.03</b> | <b>0.03</b>  | <b>-0.06</b> |
|    | $P_i (\%)$                | <b>0.9</b>                    | <b>5.8</b>   | <b>0.0</b>   | <b>0.2</b>   | <b>9.7</b>   | <b>5.4</b>   | <b>20.7</b>  | <b>0.9</b>   | <b>1.1</b>   | <b>2.8</b>   |

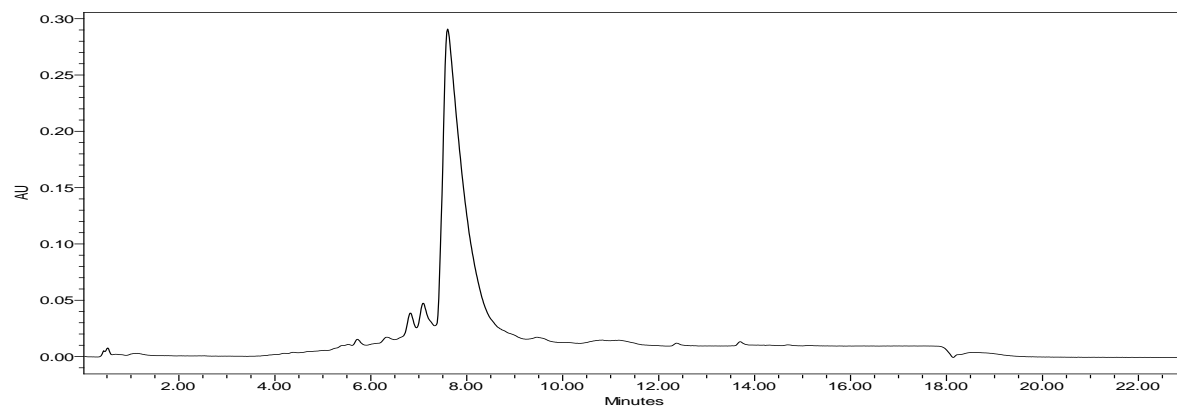

**FIGURE S1.** HPLC-UV analysis of fraction F2 produced by *Penicillium* sp. DRF2 under conditions of experiment #7.

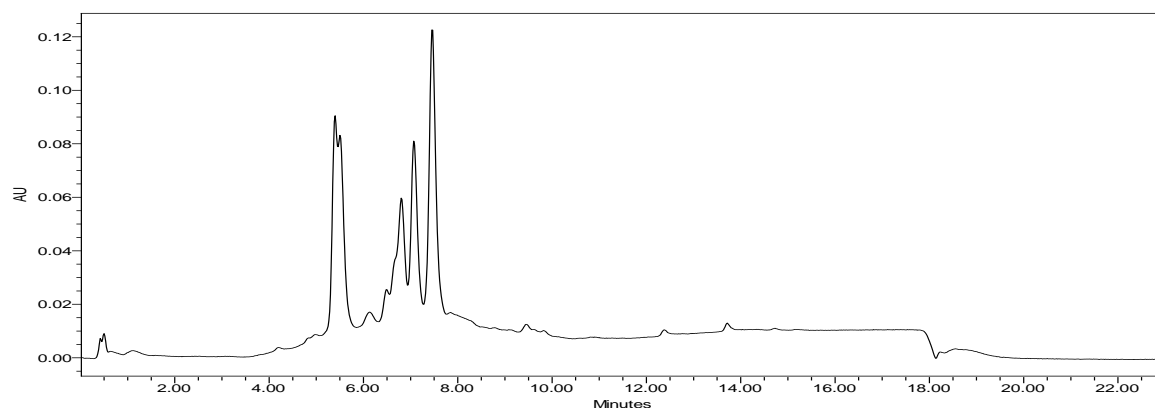

**FIGURE S2.** HPLC-UV analysis of fraction F2 produced by *Penicillium* sp. DRF2 under conditions of experiment #11.

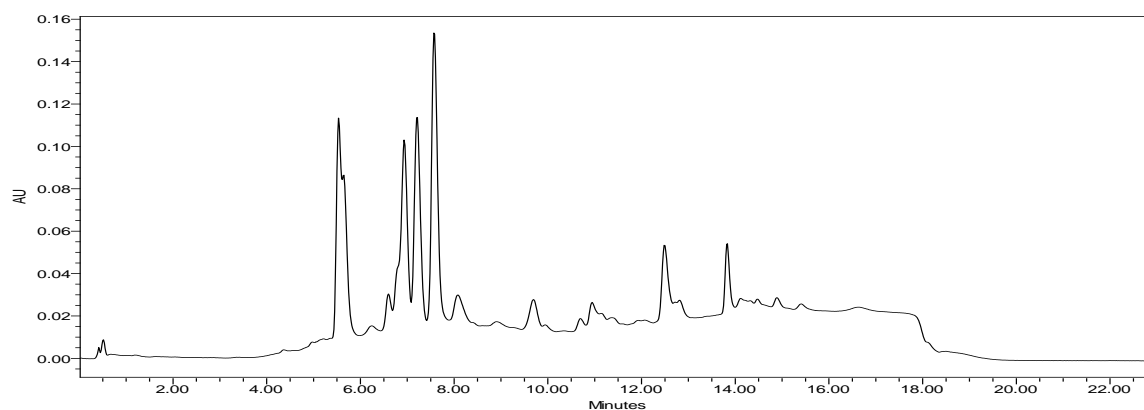

**FIGURE S3.** HPLC-UV analysis of fraction F2 produced by *Penicillium* sp. DRF2 under conditions of experiment #17.

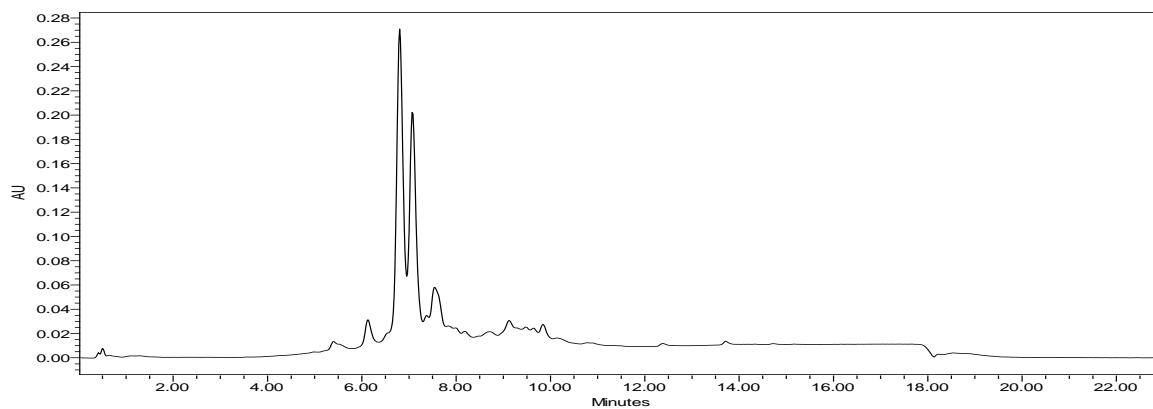

**FIGURE S4.** HPLC-UV analysis of fraction F3 produced by *Penicillium* sp. DRF2 under conditions of experiment #11.

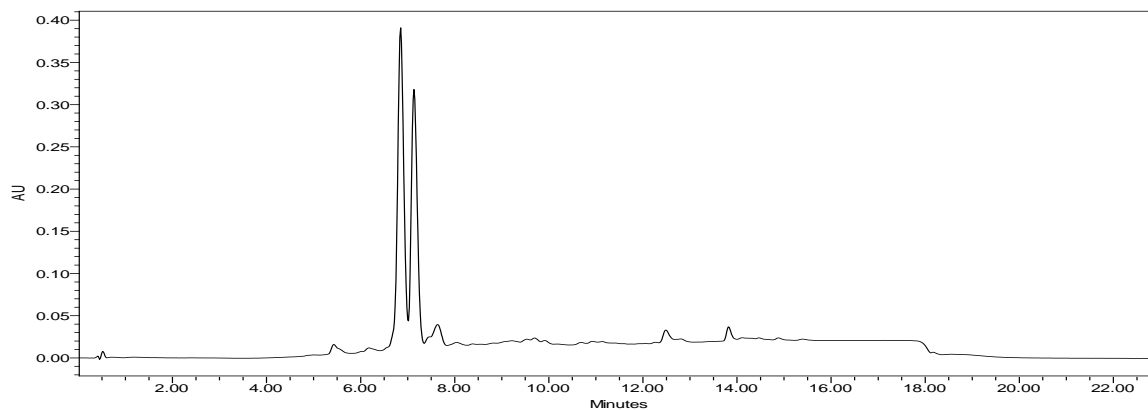

**FIGURE S5.** HPLC-UV analysis of fraction F3 produced by *Penicillium* sp. DRF2 under conditions of experiment #17.
